# Supplementary material for: Chondroprotective Actions of Selective COX-2 Inhibitors In Vivo: A Systematic Review
Source: MDPI journal article supplement (doi:10.3390/ijms21186962), 2020-09-22
Supplement: s1 [file s1]

## Supplementary Data: Cochrane risk of bias tool for clinical studies

### Tindall et al. (1)

|                                                           | Authors' judgement | Support for judgment                                                                                                   |
|-----------------------------------------------------------|--------------------|------------------------------------------------------------------------------------------------------------------------|
| Random sequence generation (selection bias)               | High risk          | No randomization was performed (open-label study)                                                                      |
| Allocation concealment (selection bias)                   | High risk          | No adequate concealment of allocations (open-label study)                                                              |
| Blinding of participants and personnel (Performance Bias) | High risk          | No blinding (open-label study)                                                                                         |
| Blinding of Outcome Assessment (Detection Bias)           | High risk          | Participants received the same treatment, no blinding in radiographic outcome assessment between two dosages celecoxib |
| Incomplete outcome data (Attrition Bias)                  | Unclear risk       | Exact numbers of missing data not reported                                                                             |
| Selective Reporting (Reporting Bias)                      | Low risk           | For all groups, all radiographic outcome measurements are given                                                        |
| Other bias                                                | None               | None                                                                                                                   |
|                                                           |                    |                                                                                                                        |

### De Boer et al. (2)

|                                                           | <b>Authors' judgement</b> | <b>Support for judgment</b>                                                                                                     |
|-----------------------------------------------------------|---------------------------|---------------------------------------------------------------------------------------------------------------------------------|
| Random sequence generation (selection bias)               | High risk                 | No randomization was performed (open-label study)                                                                               |
| Allocation concealment (selection bias)                   | High risk                 | No adequate concealment of allocations (open-label study)                                                                       |
| Blinding of participants and personnel (Performance Bias) | High risk                 | No blinding (open-label study)                                                                                                  |
| Blinding of Outcome Assessment (Detection Bias)           | Intermediate risk         | Blinding was performed to the source of cartilage for histological analysis. For biochemical analysis no blinding was performed |
| Incomplete outcome data (Attrition Bias)                  | Low risk                  | No missing data                                                                                                                 |
| Selective Reporting (Reporting Bias)                      | Low risk                  | Results of the original variables measured are given                                                                            |
| Other bias                                                | None                      | None                                                                                                                            |

**Raynauld et al. (3)**

|                                                           | <b>Authors' judgement</b> | <b>Support for judgment</b>                                           |
|-----------------------------------------------------------|---------------------------|-----------------------------------------------------------------------|
| Random sequence generation (selection bias)               | High risk                 | No randomization was performed (open-label study)                     |
| Allocation concealment (selection bias)                   | High risk                 | No adequate concealment of allocations (open-label study)             |
| Blinding of participants and personnel (Performance Bias) | High risk                 | No blinding (open-label study)                                        |
| Blinding of Outcome Assessment (Detection Bias)           | Low risk                  | Blinding was performed when analyzing primary outcome (MRI variables) |
| Incomplete outcome data (Attrition Bias)                  | Unclear risk              | Missing data not reported                                             |
| Selective Reporting (Reporting Bias)                      | Low risk                  | Results of the original variables measured are given                  |
| Other bias                                                | None                      | None                                                                  |

#### **Sawitzke et al. (4)**

1. Tindall EA, Sharp JT, Burr A, Katz TK, Wallemark CB, Verburg K, et al. A 12-month, multicenter, prospective, open-label trial of radiographic analysis of disease progression in osteoarthritis of the knee or hip in patients receiving celecoxib. Clin Ther. 2002;24(12):2051-63.

2. de Boer TN, Huisman AM, Polak AA, Niehoff AG, van Rinsum AC, Saris D, et al. The chondroprotective effect of selective COX-2 inhibition in osteoarthritis: ex vivo evaluation of

|                                                           | <b>Authors' judgement</b> | <b>Support for judgment</b>                                                                             |
|-----------------------------------------------------------|---------------------------|---------------------------------------------------------------------------------------------------------|
| Random sequence generation (selection bias)               | Unclear risk              | Randomization method not specified.                                                                     |
| Allocation concealment (selection bias)                   | Unclear risk              | The method used to conceal the allocation sequence is not described                                     |
| Blinding of participants and personnel (Performance Bias) | Unclear risk              | Blinding for treatment is described, but no description is given how participant blinding was performed |
| Blinding of Outcome Assessment (Detection Bias)           | Low risk                  | Blinding was performed in primary outcome assessment                                                    |
| Incomplete outcome data (Attrition Bias)                  | Low risk                  | Missing data are reported and no differences between randomized groups in missing data                  |
| Selective Reporting (Reporting Bias)                      | Low risk                  | Results of the original variables measured are given                                                    |
| Other bias                                                | None                      | None                                                                                                    |

human cartilage tissue after in vivo treatment. Osteoarthritis Cartilage. 2009;17(4):482-8.

3. Raynauld JP, Martel-Pelletier J, Beaulieu A, Bessette L, Morin F, Choquette D, et al. An open-label pilot study evaluating by magnetic resonance imaging the potential for a disease-modifying effect of celecoxib compared to a modeled historical control cohort in the treatment of knee osteoarthritis. Semin Arthritis Rheum. 2010;40(3):185-92.

4. Sawitzke AD, Shi H, Finco MF, Dunlop DD, Bingham CO, 3rd, Harris CL, et al. The effect of glucosamine and/or chondroitin sulfate on the progression of knee osteoarthritis: a report from the glucosamine/chondroitin arthritis intervention trial. Arthritis Rheum. 2008;58(10):3183-91.
